# Supplementary material for: Improving decolorization of dyes by laccase from Bacillus licheniformis by random and site-directed mutagenesis
Source: PeerJ. 2020 Nov 11;8:e10267. doi: 10.7717/peerj.10267 (PMC7666548; doi:10.7717/peerj.10267)
Supplement: Supplemental Information 2 [file peerj-08-10267-s002.xlsx]

## Sheet: Optimum pH
Optimum pH of enzyme
		Lac	The enzyme activity measured at pH 4.0 is defined as 100%								Lacep69	The enzyme activity measured at pH 4.0 is defined as 100%								D500G	The enzyme activity measured at pH 4.5 is defined as 100%
		pH	OD value	Enzyme activity（U/mL）	Relative enzyme activity%	AVERAGE	STDEV				pH	OD value	Enzyme activity（U/mL）	Relative enzyme activity%	AVERAGE	STDEV				pH	OD value	Enzyme activity（U/mL）	Relative enzyme activity%	AVERAGE	STDEV
		2	0.1111	7.71528	47.5905	42.8572	5.52437				2	0.0943	6.54861	33.2012	33.1572	1.23358				2	0.083295	5.78437	22.4564	24.384	1.74353
			0.0872	6.05556	37.3528							0.099	6.875	34.856							0.094295	6.54826	25.422
			0.0907	6.29861	38.852							0.0925	6.42361	32.5675							0.086895	6.03438	23.4269
			0.1112	7.72222	47.6333							0.0909	6.3125	32.0042							0.097295	6.7566	26.2308
		2.5	0.1016	7.05556	43.5211	44.9882	1.03539				2.5	0.0984	6.83333	34.6448	35.3665	0.776975				2.5	0.124795	8.66632	33.6448	33.6717	0.718372
			0.1064	7.38889	45.5772							0.0994	6.90278	34.9968							0.123095	8.54826	33.1864
			0.107	7.43056	45.8342							0.1035	7.1875	36.4404							0.122995	8.54132	33.1595
			0.1051	7.29861	45.0204							0.1005	6.97917	35.3841							0.128695	8.93715	34.6962
		3	0.094	6.52778	40.2656	45.7057	4.00447				3	0.11047	7.67153	38.8944	35.9976	1.97956				3	0.182795	12.6941	49.2816	51.5597	2.10179
			0.1062	7.375	45.4916							0.099	6.875	34.856							0.189295	13.1455	51.034
			0.1107	7.6875	47.4192							0.0983	6.82639	34.6096							0.201595	13.9997	54.3501
			0.1159	8.04861	49.6466							0.1012	7.02778	35.6306							0.191295	13.2844	51.5732
		3.5	0.1643	11.4097	70.3791	79.0534	5.94337				3.5	0.1714	11.9028	60.3467	62.9081	1.77335				3.5	0.272195	18.9024	73.3838	75.79	3.15616
			0.1868	12.9722	80.0172							0.1823	12.6597	64.1844							0.293795	20.4024	79.2072
			0.194	13.4722	83.1013							0.1792	12.4444	63.0929							0.288295	20.0205	77.7244
			0.1931	13.4097	82.7158							0.1818	12.625	64.0083							0.270195	18.7635	72.8446
		4	0.2132	14.8056	91.3258	100	5.92709				4	0.2818	19.5694	99.2164	99.9998	2.34434				4	0.361095	25.076	97.3513	91.9121	8.55633
			0.2367	16.4375	101.392							0.2848	19.7778	100.273							0.374795	26.0274	101.045
			0.2441	16.9514	104.562							0.2768	19.2222	97.456							0.312095	21.6733	84.1409
			0.2398	16.6528	102.72							0.2927	20.3264	103.054							0.315695	21.9233	85.1115
		4.5	0.144	10	61.6835	61.4372	2.84191				4.5	0.1462	10.1528	51.4742	51.9583	1.13847				4.5	0.362195	25.1524	97.6479	100	1.73795
			0.1341	9.3125	57.4427							0.1462	10.1528	51.4742							0.376495	26.1455	101.503
			0.146	10.1389	62.5402							0.1455	10.1042	51.2278							0.374995	26.0413	101.099
			0.1496	10.3889	64.0823							0.1524	10.5833	53.6571							0.369995	25.6941	99.7507
		5	0.1161	8.0625	49.7323	55.558	4.14025				5	0.141	9.79167	49.6434	50.6821	0.718395				5	0.311295	21.6177	83.9252	85.1654	3.01671
			0.1296	9	55.5151							0.1455	10.1042	51.2278							0.302395	20.9997	81.5258
			0.1357	9.42361	58.1281							0.1451	10.0764	51.0869							0.322895	22.4233	87.0526
			0.1374	9.54167	58.8563							0.1442	10.0139	50.7701							0.326995	22.708	88.1579
		5.5	0.1173	8.14583	50.2463	51.0067	0.521559				5.5	0.1403	9.74306	49.397	49.5378	2.47611				5.5	0.109195	7.58299	29.439	29.8164	0.842546
			0.1193	8.28472	51.103							0.131	9.09722	46.1226							0.110895	7.70104	29.8973
			0.12	8.33333	51.4029							0.147	10.2083	51.7559							0.107495	7.46493	28.9807
			0.1197	8.3125	51.2744							0.1445	10.0347	50.8757							0.114795	7.97187	30.9488
		6	0.0399	2.77083	17.0915	18.9655	1.75483				6	0.0515	3.57639	18.1322	20.4031	2.61055				6	0.073195	5.08299	19.7334	19.7671	1.3327
			0.0462	3.20833	19.7901							0.0537	3.72917	18.9067							0.067195	4.66632	18.1158
			0.049	3.40278	20.9895							0.0584	4.05556	20.5615							0.073595	5.11076	19.8412
			0.042	2.91667	17.991							0.0682	4.73611	24.0119							0.079295	5.5066	21.378
		6.5	0.1065	7.39583	45.6201	47.387	2.74915				6.5	0.0902	6.26389	31.7577	35.6218	5.22943				6.5	0.041295	2.86771	11.1331	12.8586	1.63117
			0.1038	7.20833	44.4635							0.0951	6.60417	33.4829							0.043795	3.04132	11.8071
			0.1162	8.06944	49.7751							0.0963	6.6875	33.9054							0.053395	3.70799	14.3953
			0.116	8.05556	49.6895							0.1231	8.54861	43.3412							0.052295	3.6316	14.0987

## Sheet: pH stability
pH stability of enzyme
		Lac	The enzyme activity measured at pH 4.0 is defined as 100%								Lacep69	The enzyme activity measured at pH 4.0 is defined as 100%								D500G	The enzyme activity measured at pH 4.5 is defined as 100%
		pH	OD value	Enzyme activity（U/mL）	Relative enzyme activity%	AVERAGE	STDEV				pH	OD value	Enzyme activity（U/mL）	Relative enzyme activity%	AVERAGE	STDEV				pH	OD value	Enzyme activity（U/mL）	Relative enzyme activity%	AVERAGE	STDEV
		2	0.2211	15.3542	29.347	26.8284	2.55325				2	0.0793	5.50694	25.9999	26.3852	2.70531				2	0.0236	1.63889	4.4036	8.75123	3.16113
			0.1754	12.1806	23.2811							0.0739	5.13194	24.2295							0.0625	4.34028	11.6621
			0.2077	14.4236	27.5684							0.0763	5.29861	25.0163							0.0555	3.85417	10.3559
			0.2043	14.1875	27.1171							0.0924	6.41667	30.295							0.046	3.19444	8.58329
		2.5	0.1865	12.9514	24.7545	25.1095	1.44701				2.5	0.0658	4.56944	21.5737	24.2131	2.64288				2.5	0.0741	5.14583	13.8266	12.8283	1.42052
			0.1801	12.5069	23.905							0.0771	5.35417	25.2786							0.0709	4.92361	13.2295
			0.1851	12.8542	24.5686							0.0689	4.78472	22.5901							0.0725	5.03472	13.528
			0.205	14.2361	27.21							0.0836	5.80556	27.4098							0.0575	3.99306	10.7291
		3	0.229	15.9028	30.3956	28.7663	1.86409				3	0.0683	4.74306	22.3934	25.8196	3.54841				3	0.1565	10.8681	29.2019	29.8223	0.458674
			0.2067	14.3542	27.4356							0.0773	5.36806	25.3442							0.161	11.1806	30.0415
			0.2026	14.0694	26.8914							0.0755	5.24306	24.754							0.1596	11.0833	29.7803
			0.2286	15.875	30.3425							0.0939	6.52083	30.7868							0.1622	11.2639	30.2654
		3.5	0.521	36.1806	69.1532	68.2075	1.38098				3.5	0.1471	10.2153	48.2294	58.0163	7.22454				3.5	0.291	20.2083	54.2987	55.5395	1.2718
			0.4988	34.6389	66.2066							0.1896	13.1667	62.1638							0.293	20.3472	54.6718
			0.5151	35.7708	68.3701							0.1969	13.6736	64.5572							0.3011	20.9097	56.1833
			0.5206	36.1528	69.1001							0.1742	12.0972	57.1146							0.3055	21.2153	57.0043
		4	0.4925	34.2014	65.3704	66.7408	8.47342				4	0.2792	19.3889	91.5408	99.9998	6.07191				4	0.3554	24.6806	66.3153	68.9369	1.90377
			0.4574	31.7639	60.7115							0.3091	21.4653	101.344							0.3753	26.0625	70.0285
			0.4655	32.3264	61.7866							0.3233	22.4514	106							0.3784	26.2778	70.6069
			0.5959	41.3819	79.0948							0.3084	21.4167	101.115							0.3687	25.6042	68.797
		4.5	0.7165	49.7569	95.1023	100	3.33145				4.5	0.2499	17.3542	81.9343	84.7129	2.45637				4.5	0.5238	36.375	97.7376	100	1.64959
			0.7666	53.2361	101.752							0.2547	17.6875	83.508							0.5353	37.1736	99.8834
			0.7592	52.7222	100.77							0.2623	18.2153	85.9998							0.5406	37.5417	100.872
			0.7713	53.5625	102.376							0.2666	18.5139	87.4097							0.544	37.7778	101.507
		5	0.7153	49.6736	94.943	94.8999	0.504075				5	0.2114	14.6806	69.3113	78.9097	7.01359				5	0.4709	32.7014	87.8668	90.4931	2.00836
			0.7191	49.9375	95.4474							0.2482	17.2361	81.3769							0.4834	33.5694	90.1992
			0.7099	49.2986	94.2263							0.2621	18.2014	85.9342							0.4893	33.9792	91.3001
			0.7156	49.6944	94.9828							0.241	16.7361	79.0162							0.4963	34.4653	92.6063
		5.5	0.6104	42.3889	81.0194	81.7063	0.710445				5.5	0.2095	14.5486	68.6884	74.4015	3.93837				5.5	0.409	28.4028	76.3167	79.9413	2.94078
			0.6169	42.8403	81.8822							0.237	16.4583	77.7048							0.4322	30.0139	80.6456
			0.6125	42.5347	81.2982							0.2312	16.0556	75.8031							0.447	31.0417	83.4072
			0.6225	43.2292	82.6255							0.23	15.9722	75.4097							0.4255	29.5486	79.3955
		6	0.1751	12.1597	23.2413	23.1086	0.332448				6	0.0906	6.29167	29.7049	33.9262	4.70925				6	0.4305	29.8958	80.3284	84.4008	2.78336
			0.1731	12.0208	22.9759							0.0915	6.35417	29.9999							0.4561	31.6736	85.1052
			0.177	12.2917	23.4935							0.1166	8.09722	38.2294							0.4587	31.8542	85.5904
			0.1712	11.8889	22.7237							0.1152	8	37.7704							0.464	32.2222	86.5793
		6.5	0.2362	16.4028	31.3512	31.0791	0.786335				6.5	0.143	9.93056	46.8851	58.6392	8.46342				6.5	0.4103	28.4931	76.5592	79.2695	2.04172
			0.2262	15.7083	30.0239							0.1896	13.1667	62.1638							0.4245	29.4792	79.2089
			0.2339	16.2431	31.046							0.2033	14.1181	66.6556							0.4279	29.7153	79.8433
			0.2403	16.6875	31.8954							0.1795	12.4653	58.8523							0.4366	30.3194	81.4667

## Sheet: Optimum temperature
Optimum temperature of enzyme
		Lac	The enzyme activity measured at 65℃ is defined as 100%									Lacep69	The enzyme activity measured at 80℃ is defined as 100%								D500G	The enzyme activity measured at 70℃ is defined as 100%
		Temperature℃	OD value	Enzyme activity（U/mL）	Relative enzyme activity%	AVERAGE	STDEV					Temperature℃	OD value	Enzyme activity（U/mL）	Relative enzyme activity%	AVERAGE	STDEV				Temperature℃	OD value	Enzyme activity（U/mL）	Relative enzyme activity%	AVERAGE	STDEV
		50	0.1666	11.5694	46.706	43.7904	1.95521					50	0.0405	2.8125	9.70815	11.2902	1.26403				50	0.1251	8.6875	15.8019	17.7093	1.38459
			0.1522	10.5694	42.669								0.047	3.26389	11.2662							0.1391	9.65972	17.5704
			0.1538	10.6806	43.1175								0.0475	3.29861	11.3861							0.1482	10.2917	18.7198
			0.1522	10.5694	42.669								0.0534	3.70833	12.8004							0.1484	10.3056	18.7451
		55	0.2215	15.3819	62.0971	62.6718	0.55388					55	0.0693	4.8125	16.6117	17.8342	1.51313				55	0.3284	22.8056	41.4817	44.709	2.20966
			0.2223	15.4375	62.3214								0.0747	5.1875	17.9061							0.3598	24.9861	45.448
			0.2257	15.6736	63.2745								0.0832	5.77778	19.9437							0.3595	24.9653	45.4101
			0.2247	15.6042	62.9942								0.0704	4.88889	16.8754							0.3681	25.5625	46.4964
		60	0.2552	17.7222	71.5448	74.8739	2.34102					60	0.1209	8.39583	28.9806	29.7657	1.55192				60	0.4194	29.125	52.9763	57.9752	3.62552
			0.2677	18.5903	75.0492								0.1173	8.14583	28.1177							0.4569	31.7292	57.7131
			0.2712	18.8333	76.0304								0.1321	9.17361	31.6654							0.4757	33.0347	60.0878
			0.2742	19.0417	76.8714								0.1264	8.77778	30.299							0.4839	33.6042	61.1236
		65	0.3538	24.5694	99.1871	100	1.16516					65	0.1629	11.3125	39.0483	37.4783	2.55836				65	0.6247	43.3819	78.9087	85.7802	4.9359
			0.3533	24.5347	99.047								0.1614	11.2083	38.6888							0.6777	47.0625	85.6034
			0.3623	25.1597	101.57								0.1607	11.1597	38.521							0.7014	48.7083	88.597
			0.3574	24.8194	100.196								0.1404	9.75	33.6549							0.7126	49.4861	90.0117
		70	0.2565	17.8125	71.9093	74.3763	1.69898					70	0.2263	15.7153	54.2458	59.9748	3.87274				70	0.7228	50.1944	91.3001	100	5.87228
			0.2665	18.5069	74.7127								0.2592	18	62.1322							0.8151	56.6042	102.959
			0.2702	18.7639	75.75								0.2545	17.6736	61.0055							0.8055	55.9375	101.746
			0.268	18.6111	75.1333								0.2608	18.1111	62.5157							0.8233	57.1736	103.995
		75	0.2231	15.4931	62.5456	64.1156	1.17991					75	0.3103	21.5486	74.3812	77.8809	3.07075				75	0.7127	49.4931	90.0244	98.1938	5.62565
			0.231	16.0417	64.7604								0.3195	22.1875	76.5865							0.7833	54.3958	98.9422
			0.228	15.8333	63.9193								0.3399	23.6042	81.4766							0.8049	55.8958	101.671
			0.2327	16.1597	65.237								0.3299	22.9097	79.0795							0.8086	56.1528	102.138
		80	0.2027	14.0764	56.8265	57.8008	0.889304					80	0.4159	28.8819	99.6943	100	0.485913				80	0.6515	45.2431	82.2939	81.9339	1.01569
			0.2046	14.2083	57.3592								0.4162	28.9028	99.7662							0.6569	45.6181	82.976
			0.2099	14.5764	58.845								0.4202	29.1806	100.725							0.6484	45.0278	81.9023
			0.2075	14.4097	58.1722								0.4164	28.9167	99.8142							0.6378	44.2917	80.5634
		85	0.2053	14.2569	57.5554	57.2891	0.634974					85	0.3841	26.6736	92.0716	99.0591	4.75695				85	0.6296	43.7222	79.5276	76.9887	2.09609
			0.2071	14.3819	58.0601								0.4188	29.0833	100.389							0.5914	41.0694	74.7024
			0.2023	14.0486	56.7144								0.4284	29.75	102.691							0.6017	41.7847	76.0035
			0.2027	14.0764	56.8265								0.4217	29.2847	101.085							0.6153	42.7292	77.7213
		90	0.2028	14.0833	56.8546	55.7542	0.805848					90	0.341	23.6806	81.7402	86.2767	3.5122				90	0.4425	30.7292	55.8942	58.2594	1.84241
			0.1964	13.6389	55.0603								0.3557	24.7014	85.2639							0.46	31.9444	58.1047
			0.1992	13.8333	55.8453								0.3713	25.7847	89.0034							0.4646	32.2639	58.6857
			0.1971	13.6875	55.2566								0.3717	25.8125	89.0993							0.4778	33.1806	60.3531
		95	0.1895	13.1597	53.1259	54.8291	1.71927					95	0.3493	24.2569	83.7298	85.24	1.36584				95	0.3551	24.6597	44.8543	46.7995	1.31412
			0.1947	13.5208	54.5838								0.3537	24.5625	84.7845							0.3733	25.9236	47.1532
			0.194	13.4722	54.3875								0.3565	24.7569	85.4557							0.3772	26.1944	47.6458
			0.2041	14.1736	57.219								0.3629	25.2014	86.9898							0.3764	26.1389	47.5448
		100	0.1817	12.6181	50.9392	51.4088	1.22016					100	0.3384	23.5	81.117	85.0482	4.21763				100	0.3652	25.3611	46.1301	45.669	0.424424
			0.1841	12.7847	51.6121								0.3519	24.4375	84.353							0.3598	24.9861	45.448
			0.1787	12.4097	50.0982								0.3492	24.25	83.7058							0.3634	25.2361	45.9027
			0.189	13.125	52.9858								0.3797	26.3681	91.0169							0.3578	24.8472	45.1953

## Sheet: Temperature stability
Temperature stability of enzyme
		Lac	The enzyme activity measured at 60℃ is defined as 100%								Lacep69	The enzyme activity measured at 65℃ is defined as 100%								D500G	The enzyme activity measured at 65℃ is defined as 100%
		Temperature℃	OD value	Enzyme activity（U/mL）	Relative enzyme activity%	AVERAGE	STDEV				Temperature℃	OD value	Enzyme activity（U/mL）	Relative enzyme activity%	AVERAGE	STDEV				Temperature℃	OD value	Enzyme activity（U/mL）	Relative enzyme activity%	AVERAGE	STDEV
		50	0.3372	23.4167	75.1922	76.558	1.22291				50	0.4319	29.9931	99.4188	97.3759	2.23362				50	0.728	50.5556	76.8942	86.337	6.41794
			0.3406	23.6528	75.9504							0.4092	28.4167	94.1935							0.8358	58.0417	88.2805
			0.3495	24.2708	77.935							0.4251	29.5208	97.8535							0.8423	58.4931	88.967
			0.346	24.0278	77.1545							0.4259	29.5764	98.0376							0.8635	59.9653	91.2062
		55	0.3454	23.9861	77.0208	79.312	1.58343				55	0.424	29.4444	97.6003	97.7211	0.597126				55	0.8251	57.2986	87.1503	96.5033	6.40329
			0.3571	24.7986	79.6297							0.4273	29.6736	98.3599							0.9242	64.1806	97.6176
			0.3586	24.9028	79.9642							0.4256	29.5556	97.9686							0.9487	65.8819	100.205
			0.3616	25.1111	80.6332							0.4212	29.25	96.9558							0.9566	66.4306	101.04
		60	0.4385	30.4514	97.7811	99.9999	1.57956				60	0.4	27.7778	92.0757	86.5339	5.13322				60	0.8268	57.4167	87.3298	95.0694	5.17217
			0.4507	31.2986	100.502							0.3518	24.4306	80.9806							0.9208	63.9444	97.2585
			0.4552	31.6111	101.505							0.3888	27	89.4976							0.9237	64.1458	97.5648
			0.4494	31.2083	100.212							0.3631	25.2153	83.5818							0.929	64.5139	98.1246
		65	0.4025	27.9514	89.7535	90.6008	0.965661				65	0.4344	30.1667	99.9943	100	0.663535				65	0.8839	61.3819	93.361	100.015	4.49275
			0.4046	28.0972	90.2218							0.4382	30.4306	100.869							0.9627	66.8542	101.684
			0.4125	28.6458	91.9834							0.4312	29.9444	99.2576							0.9774	67.875	103.237
			0.4056	28.1667	90.4448							0.4339	30.1319	99.8792							0.9636	66.9167	101.779
		70	0.3833	26.6181	85.4721	88.2817	2.24619				70	0.3775	26.2153	86.8965	88.1222	1.57107				70	0.6762	46.9583	71.4229	81.1641	6.57546
			0.3927	27.2708	87.5682							0.3923	27.2431	90.3033							0.7864	54.6111	83.0626
			0.4061	28.2014	90.5562							0.3833	26.6181	88.2316							0.801	55.625	84.6047
			0.4015	27.8819	89.5305							0.3782	26.2639	87.0576							0.8101	56.2569	85.5659
		75	0.3717	25.8125	82.8854	85.6616	2.09954				75	0.3888	27	89.4976	94.0957	3.79407				75	0.4848	33.6667	51.2065	54.9508	2.548
			0.3825	26.5625	85.2937							0.4237	29.4236	97.5312							0.5302	36.8194	56.0018
			0.3933	27.3125	87.702							0.4208	29.2222	96.8637							0.5273	36.6181	55.6955
			0.3891	27.0208	86.7654							0.4018	27.9028	92.4901							0.5387	37.4097	56.8996
		80	0.273	18.9583	60.8763	62.7159	1.52402				80	0.3609	25.0625	83.0753	84.7672	1.24466				80	0.045	3.125	4.75308	4.4098	0.320199
			0.2793	19.3958	62.2811							0.3739	25.9653	86.0678							0.0384	2.66667	4.05596
			0.2892	20.0833	64.4887							0.3695	25.6597	85.055							0.0401	2.78472	4.23552
			0.2835	19.6875	63.2177							0.3687	25.6042	84.8708							0.0435	3.02083	4.59464
		85	0.1988	13.8056	44.3304	47.0063	2.1261				85	0.1887	13.1042	43.4367	41.7966	4.12664				85	0.0628	4.36111	6.63318	6.79162	0.208769
			0.2078	14.4306	46.3373							0.2034	14.125	46.8205							0.0658	4.56944	6.95005
			0.2202	15.2917	49.1024							0.1641	11.3958	37.7741							0.0624	4.33333	6.59093
			0.2164	15.0278	48.255							0.1701	11.8125	39.1552							0.0662	4.59722	6.9923
		90	0.1142	7.93056	25.4655	26.9149	1.08466				90	0.0835	5.79861	19.2208	20.7458	2.15137				90	0.0069	0.479167	0.728805	0.715602	0.112899
			0.1207	8.38194	26.9149							0.1031	7.15972	23.7325							0.0055	0.381944	0.580931
			0.1259	8.74306	28.0744							0.0831	5.77083	19.1287							0.0066	0.458333	0.697118
			0.122	8.47222	27.2048							0.0908	6.30556	20.9012							0.0081	0.5625	0.855554
		95	0.036	2.5	8.02764	8.20046	0.402773				95	0.0392	2.72222	9.02342	10.0708	0.841897				95	0.0033	0.229167	0.348559	0.303669	0.172132
			0.0351	2.4375	7.82695							0.0454	3.15278	10.4506							0.005	0.347222	0.52812
			0.0367	2.54861	8.18373							0.0477	3.3125	10.98							0.0017	0.118056	0.179561
			0.0393	2.72917	8.76351							0.0427	2.96528	9.82909							0.0015	0.104167	0.158436
		100	0.032	2.22222	7.13568	7.67643	0.757811				100	0.0348	2.41667	8.01059	7.76889	0.43126				100	0.0017	0.118056	0.179561	0.337997	0.144052
			0.0322	2.23611	7.18028							0.0353	2.45139	8.12568							0.0045	0.3125	0.475308
			0.0342	2.375	7.62626							0.0338	2.34722	7.7804							0.0042	0.291667	0.44362
			0.0393	2.72917	8.76351							0.0311	2.15972	7.15889							0.0024	0.166667	0.253497

## Sheet: Optimum copper ion concentratio
Optimum copper ion concentration
		Lac	The enzyme activity measured without copper ions is defined as 100%						Lacep69	The enzyme activity measured without copper ions is defined as 100%						D500G	The enzyme activity measured without copper ions is defined as 100%
		Copper ion concentration/mM	OD value	Enzyme activity（U/mL）	Relative enzyme activity%	AVERAGE	STDEV		Copper ion concentration/mM	OD value	Enzyme activity（U/mL）	Relative enzyme activity%	AVERAGE	STDEV		Copper ion concentration/mM	OD value	Enzyme activity（U/mL）	Relative enzyme activity%	AVERAGE	STDEV
		0	0.1124	7.80556	98.7483	100	3.51298		0	0.0505	3.50694	84.803	100	10.8591		0	0.0638	4.43056	92.4303	100	6.37162
			0.1189	8.25694	104.459					0.0597	4.14583	100.252					0.0695	4.82639	100.688
			0.1146	7.95833	100.681					0.0654	4.54167	109.824					0.0745	5.17361	107.932
			0.1094	7.59722	96.1126					0.0626	4.34722	105.122					0.0683	4.74306	98.9497
		0.2	0.1804	12.5278	158.489	171.382	9.66966		0.2	0.3027	21.0208	508.314	487.785	39.2837		0.2	0.3248	22.5556	470.554	483.485	10.438
			0.2014	13.9861	176.939					0.3026	21.0139	508.146					0.3323	23.0764	481.42
			0.1932	13.4167	169.735					0.3012	20.9167	505.795					0.3421	23.7569	495.618
			0.2053	14.2569	180.365					0.2554	17.7361	428.885					0.3357	23.3125	486.346
		0.4	0.2171	15.0764	190.732	193.587	9.31601		0.4	0.3751	26.0486	629.893	700.591	47.8193		0.4	0.3517	24.4236	509.526	511.989	2.90955
			0.2221	15.4236	195.124					0.4258	29.5694	715.032					0.3563	24.7431	516.19
			0.2338	16.2361	205.403					0.4375	30.3819	734.68					0.353	24.5139	511.409
			0.2084	14.4722	183.088					0.4304	29.8889	722.757					0.3526	24.4861	510.83
		0.6	0.2514	17.4583	220.866	222.271	3.3988		0.6	0.3968	27.5556	666.333	738.416	49.2705		0.6	0.3445	23.9236	499.095	526.368	18.3416
			0.2566	17.8194	225.434					0.4454	30.9306	747.946					0.3673	25.5069	532.126
			0.2557	17.7569	224.643					0.461	32.0139	774.142					0.3703	25.7153	536.473
			0.2483	17.2431	218.142					0.4557	31.6458	765.242					0.3712	25.7778	537.776
		0.8	0.2579	17.9097	226.576	228.07	3.43494		0.8	0.4467	31.0208	750.129	752.816	10.9002		0.8	0.3666	25.4583	531.112	550.924	14.0483
			0.2553	17.7292	224.292					0.4571	31.7431	767.593					0.3827	26.5764	554.437
			0.2644	18.3611	232.287					0.4415	30.6597	741.397					0.3895	27.0486	564.289
			0.2608	18.1111	229.124					0.4479	31.1042	752.144					0.3823	26.5486	553.858
		1	0.2767	19.2153	243.093	235.296	5.71768		1	0.4618	32.0694	775.486	780.482	17.7952		1	0.4022	27.9306	582.688	574.865	14.7493
			0.2687	18.6597	236.065					0.4742	32.9306	796.309					0.4059	28.1875	588.048
			0.263	18.2639	231.057					0.472	32.7778	792.614					0.3964	27.5278	574.285
			0.2629	18.2569	230.969					0.4511	31.3264	757.518					0.3827	26.5764	554.437
		1.2	0.2694	18.7083	236.68	244.938	6.96768		1.2	0.3823	26.5486	641.984	653.907	12.8307		1.2	0.3597	24.9792	521.116	509.888	8.4819
			0.286	19.8611	251.263					0.3997	27.7569	671.203					0.3517	24.4236	509.526
			0.2847	19.7708	250.121					0.3904	27.1111	655.586					0.3509	24.3681	508.367
			0.2751	19.1042	241.687					0.3852	26.75	646.854					0.3455	23.9931	500.544
		1.4	0.2654	18.4306	233.165	237.338	3.44056		1.4	0.3682	25.5694	618.306	605.628	16.7492		1.4	0.3364	23.3611	487.36	507.57	14.3431
			0.2737	19.0069	240.457					0.346	24.0278	581.027					0.3503	24.3264	507.498
			0.273	18.9583	239.842					0.3633	25.2292	610.078					0.3582	24.875	518.943
			0.2685	18.6458	235.889					0.3651	25.3542	613.101					0.3565	24.7569	516.48
		1.6	0.2409	16.7292	211.641	219.746	15.2758		1.6	0.3269	22.7014	548.953	503.822	31.4424		1.6	0.3271	22.7153	473.887	486.744	21.1886
			0.2498	17.3472	219.46					0.2915	20.2431	489.507					0.3401	23.6181	492.72
			0.2746	19.0694	241.248					0.2975	20.6597	499.582					0.3547	24.6319	513.872
			0.2352	16.3333	206.633					0.2842	19.7361	477.248					0.322	22.3611	466.498
		1.8	0.2426	16.8472	213.135	217.791	5.29172		1.8	0.3492	24.25	586.4	615.536	19.8701		1.8	0.3147	21.8542	455.922	469.902	10.4755
			0.2476	17.1944	217.527					0.369	25.625	619.65					0.3229	22.4236	467.802
			0.245	17.0139	215.243					0.375	26.0417	629.725					0.33	22.9167	478.088
			0.2564	17.8056	225.258					0.373	25.9028	626.367					0.3298	22.9028	477.798
		2	0.2413	16.7569	211.992	213.618	9.18361		2	0.3822	26.5417	641.816	624.184	12.026		2	0.3141	21.8125	455.053	468.925	9.58761
			0.2431	16.8819	213.574					0.3663	25.4375	615.116					0.325	22.5694	470.844
			0.2568	17.8333	225.61					0.37	25.6944	621.329					0.3292	22.8611	476.929
			0.2314	16.0694	203.295					0.3683	25.5764	618.474					0.3264	22.6667	472.872

## Sheet: ABTS concentration and enzyme a
ABTS concentration and enzyme activity
		Lac								Lacep69							D500G
		ABTS concentration	OD value	Enzyme activity（U/mL）	AVERAGE	STDEV				ABTS concentration	OD value	Enzyme activity（U/mL）	AVERAGE	STDEV			ABTS concentration	OD value	Enzyme activity（U/mL）	AVERAGE	STDEV
		0.025	0.1592	11.0556	11.6146	0.404629				0.0125	0.0027	0.1875	0.309028	0.202424			0.0125	0.0557	3.86806	3.90451	0.0421938
			0.1668	11.5833							0.0046	0.319444						0.0561	3.89583
			0.1709	11.8681							0.0085	0.590278						0.056	3.88889
			0.1721	11.9514							0.002	0.138889						0.0571	3.96528
		0.05	0.2108	14.6389	15.0868	0.59632				0.025	0.0459	3.1875	3.31424	0.101806			0.025	0.073	5.06944	5.73611	0.505086
			0.2121	14.7292							0.0491	3.40972						0.0864	6
			0.2296	15.9444							0.0487	3.38194						0.0813	5.64583
			0.2165	15.0347							0.0472	3.27778						0.0897	6.22917
		0.075	0.2362	16.4028	17.0243	0.506564				0.05	0.0788	5.47222	5.77604	0.239382			0.05	0.1322	9.18056	9.32812	0.148658
			0.2422	16.8194							0.0846	5.875						0.134	9.30556
			0.251	17.4306							0.0869	6.03472						0.1338	9.29167
			0.2512	17.4444							0.0824	5.72222						0.1373	9.53472
		0.1	0.2447	16.9931	17.2604	0.487185				0.075	0.1019	7.07639	7.15104	0.0902555			0.075	0.1702	11.8194	12.4253	0.431874
			0.2406	16.7083							0.1018	7.06944						0.1789	12.4236
			0.2545	17.6736							0.1041	7.22917						0.1842	12.7917
			0.2544	17.6667							0.1041	7.22917						0.1824	12.6667
		0.125	0.2458	17.0694	17.625	0.413685				0.1	0.0939	6.52083	7.03125	0.505166			0.1	0.1983	13.7708	14.1267	0.256561
			0.2532	17.5833							0.1073	7.45139						0.2065	14.3403
			0.2565	17.8125							0.0961	6.67361						0.2057	14.2847
			0.2597	18.0347							0.1077	7.47917						0.2032	14.1111
		0.25	0.2788	19.3611	19.7778	0.29337				0.125	0.0949	6.59028	7.1875	0.502277			0.125	0.195	13.5417	14.066	0.504369
			0.2849	19.7847							0.1031	7.15972						0.2081	14.4514
			0.288	20							0.1126	7.81944						0.1977	13.7292
			0.2875	19.9653							0.1034	7.18056						0.2094	14.5417
		0.5	0.258	17.9167	18.8715	0.790295				0.25	0.1113	7.72917	8.64757	0.636579			0.25	0.3106	21.5694	22.8958	0.888997
			0.267	18.5417							0.1261	8.75694						0.3378	23.4583
			0.2827	19.6319							0.1322	9.18056						0.3358	23.3194
			0.2793	19.3958							0.1285	8.92361						0.3346	23.2361
		0.75	0.2698	18.7361	19.7361	0.690847				0.5	0.1269	8.8125	9.77951	0.673322			0.5	0.2713	18.8403	19.809	0.757645
			0.2854	19.8194							0.1417	9.84028						0.2868	19.9167
			0.2901	20.1458							0.1463	10.1597						0.285	19.7917
			0.2915	20.2431							0.1484	10.3056						0.2979	20.6875
		1	0.2562	17.7917	18.5642	0.57914				0.75	0.1369	9.50694	10.25	0.62572			0.75	0.2249	15.6181	16.0903	0.794707
			0.2669	18.5347							0.1457	10.1181						0.2375	16.4931
			0.2761	19.1736							0.1587	11.0208						0.2197	15.2569
			0.2701	18.7569							0.1491	10.3542						0.2447	16.9931
		1.25	0.2823	19.6042	20.691	0.724544				1	0.1386	9.625	10.6319	0.68463			1	0.2713	18.8403	19.4062	0.566402
			0.3032	21.0556							0.1554	10.7917						0.2747	19.0764
			0.3032	21.0556							0.1583	10.9931						0.2896	20.1111
			0.3031	21.0486							0.1601	11.1181						0.2822	19.5972
		1.5	0.2629	18.2569	19.3281	0.744069				1.25	0.1376	9.55556	9.99479	0.344871			1.25	0.2558	17.7639	20.3142	1.99425
			0.2793	19.3958							0.1424	9.88889						0.3225	22.3958
			0.2848	19.7778							0.1485	10.3125						0.306	21.25
			0.2863	19.8819							0.1472	10.2222						0.2858	19.8472
		1.75	0.2777	19.2847	19.8663	0.446047				1.5	0.1503	10.4375	10.4219	0.0704499			1.5	0.2953	20.5069	21.3073	0.603311
			0.2847	19.7708							0.1495	10.3819						0.3052	21.1944
			0.2924	20.3056							0.1514	10.5139						0.3119	21.6597
			0.2895	20.1042							0.1491	10.3542						0.3149	21.8681
		2	0.2724	18.9167	18.7361	0.499099				1.75	0.1286	8.93056	9.42014	0.398303			1.75	0.2882	20.0139	21.0938	0.753005
			0.2666	18.5139							0.1336	9.27778						0.3045	21.1458
			0.2618	18.1806							0.1389	9.64583						0.3105	21.5625
			0.2784	19.3333							0.1415	9.82639						0.3118	21.6528
		2.25	0.2497	17.3403	17.7951	0.491586				2	0.1231	8.54861	9.48264	0.716199			2	0.2542	17.6528	18.1476	0.577472
			0.2534	17.5972							0.1381	9.59028						0.2609	18.1181
			0.2557	17.7569							0.1482	10.2917						0.2571	17.8542
			0.2662	18.4861							0.1368	9.5						0.2731	18.9653
		2.5	0.2639	18.3264	18.6163	0.373211				2.25	0.1308	9.08333	9.46354	0.311979			2.5	0.2639	18.3264	19.3958	1.09483
			0.2632	18.2778							0.1344	9.33333						0.2696	18.7222
			0.2711	18.8264							0.1398	9.70833						0.2848	19.7778
			0.2741	19.0347							0.1401	9.72917						0.2989	20.7569
										2.5	0.1013	7.03472	8.2691	1.05471			3	0.2716	18.8611	19.9062	0.718954
											0.1121	7.78472						0.295	20.4861
											0.1347	9.35417						0.2888	20.0556
											0.1282	8.90278						0.2912	20.2222
										2.75	0.1355	9.40972	9.20139	0.384399
											0.1309	9.09028
											0.1381	9.59028
											0.1255	8.71528
