# Supplementary material for: Improving decolorization of dyes by laccase from Bacillus licheniformis by random and site-directed mutagenesis
Source: PeerJ. 2020 Nov 11;8:e10267. doi: 10.7717/peerj.10267 (PMC7666548; doi:10.7717/peerj.10267)
Supplement: Supplemental Information 3 [file peerj-08-10267-s003.xls]

## Sheet: Sheet1
		Lac											Lacep69											D500G
		time	OD value	Enzyme activity（U/mL）	Protein content（mg/mL）	Specific vitality（U/mg）	AVERAGE	STDEV					time	OD value	Enzyme activity（U/mL）	Protein content（mg/mL）	Specific vitality（U/mg）	AVERAGE	STDEV					time	OD value	Enzyme activity（U/mL）	Protein content（mg/mL）	Specific vitality（U/mg）	AVERAGE	STDEV
		0h	0.0466	0.647222	0.351641	1.84058	1.79173	0.215081					0h	0.01005	0.139583	0.570898	0.244498	0.382546	0.215081					0h	0.0289	2.00694	0.323	6.21345	8.26278	1.38777
			0.0519	0.720833	0.404016	1.78417								0.01795	0.249306	0.608398	0.409773								0.0427	2.96528	0.3195	9.28099
			0.0442	0.613889	0.406328	1.51082								0.02055	0.285417	0.606211	0.470821								0.0422	2.93056	0.3365	8.70893
			0.0492	0.683333	0.336391	2.03137								0.01795	0.249306	0.61543	0.405092								0.043	2.98611	0.3375	8.84774
		2h	0.0844	1.17222	0.219906	5.33055	5.15774	0.358155					2h	0.05675	0.788194	0.653086	1.20688	1.25128	0.358155					2h	0.0677	4.70139	0.386625	12.1601	12.6997	1.04634
			0.0764	1.06111	0.229469	4.62421								0.06645	0.922917	0.669961	1.37757								0.078	5.41667	0.38075	14.2263
			0.0834	1.15833	0.219094	5.28693								0.05955	0.827083	0.686523	1.20474								0.0671	4.65972	0.39125	11.9098
			0.0863	1.19861	0.222406	5.38929								0.05775	0.802083	0.659648	1.21593								0.0717	4.97917	0.39825	12.5026
		4h	0.1336	1.85556	0.292844	6.33633	6.05713	0.198555					4h	0.07485	1.03958	0.780117	1.3326	1.46374	0.198555					4h	0.1148	7.97222	0.4535	17.5793	19.7092	1.63766
			0.1244	1.72778	0.294156	5.87367								0.09235	1.28264	0.746367	1.71851								0.1373	9.53472	0.449375	21.2177
			0.1307	1.81528	0.300469	6.04149								0.08505	1.18125	0.78043	1.51359								0.135	9.375	0.452	20.7412
			0.131	1.81944	0.304406	5.97703								0.07385	1.02569	0.794961	1.29025								0.1262	8.76389	0.454125	19.2984
		6h	0.2065	2.86806	0.269844	10.6286	10.9097	0.497472					6h	0.20975	2.91319	0.586055	4.97086	5.21105	0.497472					6h	0.3168	22	0.53625	41.0256	43.8725	2.0536
			0.217	3.01389	0.268594	11.221								0.22515	3.12708	0.608555	5.13854								0.3371	23.4097	0.50975	45.9239
			0.208	2.88889	0.278781	10.3626								0.21425	2.97569	0.570742	5.21373								0.3259	22.6319	0.51	44.3764
			0.211	2.93056	0.256469	11.4266								0.21955	3.04931	0.552305	5.52106								0.3307	22.9653	0.52	44.164
		8h	1.0044	13.95	0.377719	36.9322	37.466	0.886734					8h	0.53065	7.37014	1.08012	6.82346	7.47721	0.886734					8h	0.3711	25.7708	0.526875	48.9126	50.0987	0.952813
			1.0199	14.1653	0.385406	36.7541								0.56325	7.82292	1.03652	7.54726								0.3938	27.3472	0.53625	50.9972
			1.05	14.5833	0.376656	38.7179								0.57345	7.96458	1.04621	7.61279								0.3897	27.0625	0.543875	49.7587
			1.0356	14.3833	0.383969	37.4596								0.56855	7.89653	0.996367	7.92532								0.3897	27.0625	0.5335	50.7263
		10h	1.1686	16.2306	0.431906	37.5789	37.8373	0.615206					10h	1.89863	52.7396	1.07418	49.0975	51.2431	0.615206					10h	0.6999	48.6042	0.6315	76.9662	80.1786	2.41576
			1.1913	16.5458	0.428031	38.6557								1.95243	54.234	1.05184	51.5613								0.7401	51.3958	0.621	82.763
			1.2098	16.8028	0.443281	37.9055								1.96243	54.5118	1.05793	51.5269								0.7408	51.4444	0.636	80.8875
			1.1767	16.3431	0.439219	37.2094								1.96053	54.459	1.03168	52.7868								0.7464	51.8333	0.647125	80.0979
		12h	0.6914	9.60278	0.378594	25.3643	23.9615	1.31007					12h	0.61235	8.50486	0.959336	8.86536	9.80527	1.31007					12h	0.9052	62.8611	0.656625	95.7337	103.08	5.16003
			0.6864	9.53333	0.408719	23.3249								0.65635	9.11597	0.919336	9.91582								0.9639	66.9375	0.630875	106.103
			0.7122	9.89167	0.400594	24.6925								0.67155	9.32708	0.924648	10.0872								0.9663	67.1042	0.6495	103.317
			0.6725	9.34028	0.415781	22.4644								0.65825	9.14236	0.883086	10.3527								0.9813	68.1458	0.635875	107.169
		14h	1.6131	22.4042	0.449156	49.8806	50.2294	0.386079					14h	1.25615	17.4465	1.01262	17.2291	19.0043	0.386079					14h	1.9917	138.312	0.82675	167.297	168.574	2.24438
			1.6676	23.1611	0.461906	50.1425								1.37405	19.084	0.93793	20.347								2.0565	142.812	0.84625	168.759
			1.6877	23.4403	0.461594	50.7812								1.35245	18.784	0.993242	18.9118								2.068	143.611	0.836625	171.655
			1.6407	22.7875	0.454719	50.1134								1.35375	18.8021	0.962773	19.5291								2.0702	143.764	0.863	166.586
