# Supplementary material for: Improving decolorization of dyes by laccase from Bacillus licheniformis by random and site-directed mutagenesis
Source: PeerJ. 2020 Nov 11;8:e10267. doi: 10.7717/peerj.10267 (PMC7666548; doi:10.7717/peerj.10267)
Supplement: Supplemental Information 4 [file peerj-08-10267-s004.xlsx]

## Sheet: Lac
		OD value	Primitive enzyme activity U/mL	Enzymatic activity in dyes U/mL
		1.453	1009.03	201.806
		1.4937	1037.29	207.458
		1.5309	1063.12	212.625
		1.5316	1063.61	212.722
	AVERAGE	1.5023	1043.26	208.653
	STDEV		25.9246	5.18492
	Degradation rate of methyl orange by Lac							Degradation rate of alphazurine A by Lac							Degradation rate of acid violet by Lac
	Lac							Lac							Lac
	time	OD value	Degradation of Methyl orange%	AVERAGE	STDEV	ANOVA		time	OD value	Degradation of Alphazurine A%	AVERAGE	STDEV	ANOVA		time	OD value	Degradation of Acid violet%	AVERAGE	STDEV	ANOVA
	0h	0.7286	-0.690989	0.00345495	0.53433	e		0h	0.7645	0.907323	-0.00324044	1.40492	f		0h	0.4253	0.351453	3.27516e-15	0.914077	e
		0.7236	0						0.7602	1.46468						0.4261	0.164011
		0.7229	0.0967385						0.7789	-0.95917						0.4234	0.796626
		0.7192	0.608071						0.7825	-1.42579						0.4324	-1.31209
	0.5h	0.6151	8.1937	7.40643	0.64447	d		0.5h	0.4804	20.6184	19.1593	0.975989	e		0.5h	0.1885	30.5104	28.2987	2.05725	d
		0.6295	7.10624						0.5089	18.5998						0.2099	27.7705
		0.6348	6.706						0.5063	18.7839						0.1987	29.2045
		0.6227	7.61976						0.5084	18.6352						0.226	25.7092
	1h	0.5739	11.305	11.5429	0.363873	c		1h	0.4534	22.5308	22.9115	0.621857	d		1h	0.1338	37.5139	37.3763	0.192299	c
		0.5758	11.1616						0.4495	22.807						0.1343	37.4499
		0.5672	11.811						0.454	22.4883						0.1343	37.4499
		0.5661	11.8941						0.4352	23.8199						0.1371	37.0914
	2h	0.5687	11.6977	11.8733	0.269362	c		2h	0.4281	24.3228	24.4078	0.230168	c		2h	0.1262	38.4869	38.2885	0.342993	c
		0.5692	11.66						0.4309	24.1245						0.1255	38.5766
		0.5614	12.249						0.4249	24.5494						0.1278	38.2821
		0.5662	11.8865						0.4237	24.6344						0.1315	37.8084
	3h	0.553	12.8834	12.4963	1.03456	bc		3h	0.4341	23.8978	24.8682	1.04184	c		3h	0.1221	39.0119	38.4325	0.610044	c
		0.5742	11.2824						0.4309	24.1245						0.123	38.8967
		0.5631	12.1206						0.4137	25.3427						0.1299	38.0132
		0.5422	13.699						0.4029	26.1077						0.1315	37.8084
	4h	0.5487	13.2081	13.4403	0.501626	b		4h	0.4176	25.0665	25.6597	0.714461	bc		4h	0.1366	37.1554	38.9991	1.28358	bc
		0.5424	13.6839						0.3983	26.4335						0.1142	40.0234
		0.5532	12.8683						0.418	25.0382						0.1168	39.6905
		0.5382	14.001						0.403	26.1006						0.1212	39.1271
	5h	0.515	15.7531	16.3006	0.404262	a		5h	0.4025	26.136	26.1714	0.516811	b		5h	0.1138	40.0746	40.4779	1.19899	ab
		0.5031	16.6517						0.4001	26.306						0.1189	39.4216
		0.5085	16.2439						0.4115	25.4985						0.0972	42.1999
		0.5044	16.5535						0.3939	26.7451						0.1127	40.2154
	6h	0.4803	18.3735	17.2445	1.23638	a		6h	0.3505	29.8191	29.6934	0.409684	a		6h	0.1088	40.7147	41.6398	0.644793	a
		0.4908	17.5806						0.3547	29.5217						0.1	41.8414
		0.5186	15.4812						0.3587	29.2383						0.0971	42.2127
		0.4913	17.5428						0.3452	30.1945						0.1004	41.7902

## Sheet: ep69
		OD value	Primitive enzyme activity U/mL	Enzymatic activity in dyes U/mL
		1.1108	77.1389	617.111	77.1389
		1.2273	85.2292	681.833	85.2292
		1.2215	84.8264	678.611	84.8264
		1.2127	84.2153	673.722	84.2153
	AVERAGE	1.19307	82.8524	662.819	82.8524
	STDEV			30.6541	3.83177
	Degradation rate of methyl orange by Lacep69							Degradation rate of alphazurine A by Lacep69							Degradation rate of acid violet by Lacep69
	Lacep69							Lacep69							Lacep69
	time	OD value	Degradation of Methyl orange%	AVERAGE	STDEV	ANOVA		time	OD value	Degradation of Alphazurine A%	AVERAGE	STDEV	ANOVA		time	OD value	Degradation of Acid violet%	AVERAGE	STDEV	ANOVA
	0h	0.6273	-0.98197	-0.0120734	1.53161	e		0h	0.6415	2.13577	-0.00381388	1.81971	e		0h	0.3861	-2.25106	-3.60822e-15	1.7148	d
		0.6246	-0.547328						0.6525	0.457666						0.3776	0
		0.6261	-0.788796						0.6702	-2.24256						0.3763	0.34428
		0.6071	2.2698						0.6579	-0.366133						0.3704	1.90678
	0.5h	0.5797	6.88104	4.29028	2.43041	d		0.5h	0.3632	45.9297	46.0986	0.783706	d		0.5h	0.1489	62.3837	62.4451	1.6129	c
		0.5949	4.36075						0.3552	47.1867						0.1425	64.1295
		0.5917	4.89134						0.363	45.9611						0.1467	62.9838
		0.615	1.02801						0.3671	45.3169						0.1566	60.2834
	1h	0.5845	6.08516	5.19394	0.738094	cd		1h	0.2408	65.1626	65.7519	1.25617	c		1h	0.1395	64.9478	64.4841	1.45401	c
		0.5891	5.32244						0.2325	66.4668						0.1347	66.2572
		0.5906	5.07373						0.2286	67.0796						0.1435	63.8567
		0.5953	4.29443						0.2463	64.2984						0.1471	62.8747
	2h	0.5717	8.2075	6.66963	1.71521	bcd		2h	0.195	72.3593	68.812	4.54533	bc		2h	0.1192	70.4852	64.9683	3.71498	c
		0.5845	6.08516						0.1918	72.8621						0.1438	63.7749
		0.594	4.50998						0.2509	63.5756						0.1462	63.1202
		0.5737	7.87589						0.2326	66.4511						0.1485	62.4928
	3h	0.5707	8.37331	7.1256	1.0067	bc		3h	0.1997	71.6207	70.0651	1.75637	ab		3h	0.0903	78.3684	75.0337	3.64978	b
		0.5773	7.27898						0.2055	70.7094						0.0976	76.3771
		0.5795	6.9142						0.2076	70.3794						0.1007	75.5315
		0.5854	5.93593						0.2256	67.551						0.1215	69.8578
	4h	0.5518	11.5071	8.24481	2.21908	b		4h	0.2071	70.458	70.4423	2.13842	ab		4h	0.0958	76.8681	76.6499	0.190292	b
		0.5814	6.59916						0.215	69.2166						0.0963	76.7317
		0.5749	7.67692						0.2186	68.651						0.0969	76.5681
		0.5778	7.19607						0.1881	73.4435						0.0974	76.4317
	5h	0.5307	15.0056	14.0771	1.61933	a		5h	0.2207	68.321	71.3065	2.09007	ab		5h	0.0707	83.7148	82.1054	1.23223	a
		0.5504	11.7392						0.1897	73.1921						0.0772	81.9417
		0.5352	14.2595						0.199	71.7307						0.0817	80.7142
		0.5289	15.3041						0.1974	71.9822						0.0768	82.0508
	6h	0.5281	15.4367	14.873	1.1442	a		6h	0.1952	72.3278	72.7167	2.27534	a		6h	0.0658	85.0514	83.9057	0.986024	a
		0.53	15.1217						0.2121	69.6723						0.0734	82.9783
		0.5416	13.1983						0.1839	74.1034						0.0726	83.1965
		0.563	15.7352						0.1797	74.7634						0.0682	84.3967

## Sheet: D500G
		OD value	Primitive enzyme activity U/mL	Enzymatic activity in dyes U/mL
		0.5308	1843.06	368.611
		0.5573	1935.07	387.014
		0.5706	1981.25	396.25
		0.5844	2029.17	405.833
	AVERAGE	0.560775	1947.14	389.427
	STDEV		79.3119	15.8624
	Degradation rate of methyl orange by D500G							Degradation rate of alphazurine A by D500G							Degradation rate of acid violet by D500G
	D500G							D500G							D500G
	time	OD value	Degradation of Methyl orange%	AVERAGE	STDEV	ANOVA		time	OD value	Degradation of Alphazurine A%	AVERAGE	STDEV	ANOVA		time	OD value	Degradation of Acid violet%	AVERAGE	STDEV	ANOVA
	0h	0.6574	0.709863	0.00755173	0.934667	d		0h	0.703	-1.32603	-1.19349e-14	1.58259	f		0h	0.3901	-1.21951	1.08247e-14	0.872994	f
		0.6563	0.876001						0.688	0.835976						0.3853	0.0259471
		0.6655	-0.513518						0.6812	1.81609						0.3823	0.804359
		0.669	-1.04214						0.703	-1.32603						0.3839	0.389206
	0.5h	0.601	8.31371	8.78994	1.63711	c		0.5h	0.3815	40.5522	43.0713	2.2472	e		0.5h	0.2013	43.0347	43.8938	2.89755	e
		0.5812	11.0078						0.3707	41.9546						0.1982	43.7594
		0.61	7.0891						0.3428	45.5774						0.2103	40.9309
		0.5978	8.74912						0.3534	44.201						0.1807	47.8501
	1h	0.5873	10.1778	12.3515	2.08547	b		1h	0.285	53.0828	53.2938	0.830661	d		1h	0.1329	59.0237	59.2166	0.35828	d
		0.5769	11.5929						0.2862	52.927						0.1317	59.3042
		0.5509	15.1307						0.2883	52.6543						0.1336	58.8601
		0.5702	12.5046						0.274	54.5111						0.1301	59.6783
	2h	0.5695	12.5998	12.6849	1.08048	b		2h	0.2434	58.4845	56.3745	1.80576	c		2h	0.1118	63.956	64.856	1.9037	c
		0.5578	14.1918						0.253	57.238						0.1073	65.0079
		0.5765	11.6474						0.2689	55.1734						0.1158	63.021
		0.5717	12.3005						0.2733	54.602						0.0969	67.439
	3h	0.5646	13.2666	12.94	1.79165	b		3h	0.2611	56.1862	57.8548	1.18453	bc		3h	0.0925	68.4675	67.3397	0.912228	b
		0.5645	13.2802						0.2417	58.7053						0.0983	67.1117
		0.5537	14.7497						0.2418	58.6923						0.1019	66.2702
		0.5852	10.4636						0.2484	57.8353						0.0966	67.5091
	4h	0.5302	17.9473	16.3961	1.39352	a		4h	0.2491	57.7444	59.0559	1.10064	ab		4h	0.0958	67.6961	68.3799	0.549661	b
		0.5506	15.1715						0.2316	60.0168						0.0914	68.7247
		0.5499	15.2667						0.2324	59.9129						0.0906	68.9117
		0.5357	17.1989						0.2429	58.5495						0.0937	68.187
	5h	0.5267	18.4235	16.9268	1.19801	a		5h	0.2406	58.8481	59.598	0.70681	ab		5h	0.0855	70.1038	69.5136	0.743964	ab
		0.5443	16.0287						0.2374	59.2636						0.0863	69.9168
		0.5453	15.8926						0.2333	59.796						0.0877	69.5896
		0.5345	17.3622						0.228	60.4842						0.0926	68.4442
	6h	0.5172	19.7161	17.9337	1.28399	a		6h	0.233	59.835	60.0525	0.712275	a		6h	0.0848	70.2675	71.0973	2.89372	a
		0.5393	16.7091						0.2382	59.1598						0.0762	72.2778
		0.5341	17.4166						0.2257	60.7829						0.0965	67.5325
		0.5306	17.8928						0.2284	60.4323						0.0675	74.3115

## Sheet: ANOVA
	The significance of three enzymes in dye degradation was analyzed.
	ANOVA
	Methyl orange				SS	df	MS	F	P-value
	Lac	Between	（Combination）		838.055	7	119.722	244.342	0
			Linear	Compared	628.382	1	628.382	1282.47	0
				Deviation	209.672	6	34.945	71.32	0
		Group				11.759	24	0.49
		Group				849.814	31
	ep69	Between	（Combination）		684.114	7	97.731	36.182	0
			Linear	Compared	622.414	1	622.414	230.432	0
				Deviation	61.7	6	10.283	3.807	0.008
		Group				64.826	24	2.701
		Group				748.94	31
	D500G	Between	（Combination）		935.564	7	133.652	61.783	0
			Linear	Compared	677.652	1	677.652	313.255	0
				Deviation	257.912	6	42.985	19.871	0
		Group				51.918	24	2.163
		Group				987.483	31
	ANOVA
	alphazurine A				SS	df	MS	F	P-value
	Lac	Between	（Combination）		2383.29	7	340.47	504.695	0
			Linear	Compared	1267.55	1	1267.55	1878.95	0
				Deviation	1115.74	6	185.957	275.652	0
		Group				16.191	24	0.675
		Group				2399.48	31
	ep69	Between	（Combination）		17507.7	7	2501.1	461.385	0
			Linear	Compared	8143.09	1	8143.09	1502.18	0
				Deviation	9364.6	6	1560.77	287.919	0.008
		Group				130.1	24	5.421
		Group				17637.8	31
	D500G	Between	（Combination）		11688.2	7	1669.75	883.075	0
			Linear	Compared	5241.79	1	5241.79	2772.21	0
				Deviation	6446.45	6	1074.41	568.219	0
		Group				45.38	24	1.891
		Group				11733.6	31
	ANOVA
	Acid violet				SS	df	MS	F	P-value
	Lac	Between	（Combination）		5417.03	7	773.862	680.654	0
			Linear	Compared	2458.82	1	2458.82	2162.66	0
				Deviation	2958.22	6	493.036	433.652	0
		Group				27.287	24	1.137
		Group				5444.32	31
	ep69	Between	（Combination）		20418.7	7	2916.95	625.537	0
			Linear	Compared	10884	1	10884	2334.07	0
				Deviation	9534.64	6	1589.11	340.782	0.008
		Group				111.915	24	4.663
		Group				20530.6	31
	D500G	Between	（Combination）		16248.1	7	2321.15	808.352	0
			Linear	Compared	8489.34	1	8489.34	2956.45	0
				Deviation	7758.72	6	1293.12	450.335	0
		Group				68.915	24	2.871
		Group				16317	31
